# Supplementary material for: The ddeq Python library for point source quantification from remote sensing images (version 1.0)
Source: Copernicus journal article supplement (doi:10.5194/gmd-17-4773-2024), 2024-06-18
Supplement: Supplementary file 1 [file gmd-17-4773-2024-supplement.zip]

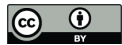

*Supplement of*

## **The *ddeq* Python library for point source quantification from remote sensing images (version 1.0)**

**Gerrit Kuhlmann et al.**

*Correspondence to:* Gerrit Kuhlmann ([gerrit.kuhlmann@empa.ch](mailto:gerrit.kuhlmann@empa.ch))

- `gmd-17-4773-2024-supplement-title-page.pdf`
- `ddeq-1.0.tar.gz`
- `html`
  - `.buildinfo`
  - `_images`
    - \* `example_annual_emissions_12_0.png`
    - \* `example_annual_emissions_5_0.png`
    - \* `example_tropomi_Matimba_10_0.png`
    - \* `example_tropomi_Matimba_11_0.png`
    - \* `example_tropomi_Matimba_15_0.png`
    - \* `example_tropomi_Matimba_17_1.png`
    - \* `example_tropomi_Matimba_3_0.png`
    - \* `example_tropomi_Matimba_8_0.png`
    - \* `example_tropomi_Matimba_9_1.png`
    - \* `tutorial-introduction-to-ddeq_10_0.png`
    - \* `tutorial-introduction-to-ddeq_18_0.png`
    - \* `tutorial-introduction-to-ddeq_24_0.png`
    - \* `tutorial-introduction-to-ddeq_29_0.png`
    - \* `tutorial-introduction-to-ddeq_32_0.png`
    - \* `tutorial-introduction-to-ddeq_37_0.png`
    - \* `tutorial-introduction-to-ddeq_45_0.png`
    - \* `tutorial-introduction-to-ddeq_47_0.png`
    - \* `tutorial-introduction-to-ddeq_8_0.png`
  - `_sources`
    - \* `api-data-input.rst.txt`
    - \* `api-post-processing.rst.txt`
    - \* `api-pre-processing.rst.txt`

- \* api-quantification.rst.txt
- \* biblio.rst.txt
- \* example\_annual\_emissions.ipynb.txt
- \* example\_tropomi\_Matimba.ipynb.txt
- \* index.rst.txt
- \* installation.rst.txt
- \* tutorial-introduction-to-ddeq.ipynb.txt
- \* tutorial.rst.txt
- \* usage.rst.txt
- \_static
  - \* basic.css
  - \* debug.css
  - \* doctools.js
  - \* documentation\_options.js
  - \* file.png
  - \* language\_data.js
  - \* minus.png
  - \* nbsphinx-broken-thumbnail.svg
  - \* nbsphinx-code-cells.css
  - \* nbsphinx-gallery.css
  - \* nbsphinx-no-thumbnail.svg
  - \* plus.png
  - \* pygments.css
  - \* scripts
  - \* searchtools.js
  - \* skeleton.css
  - \* sphinx\_highlight.js
  - \* styles
- api-data-input.html
- api-post-processing.html
- api-pre-processing.html
- api-quantification.html
- biblio.html
- example\_annual\_emissions.html
- example\_annual\_emissions.ipynb
- example\_tropomi\_Matimba.html
- example\_tropomi\_Matimba.ipynb
- genindex.html
- index.html
- installation.html
- objects.inv
- search.html
- searchindex.js
- tutorial-introduction-to-ddeq.html
- tutorial-introduction-to-ddeq.ipynb
- tutorial.html
- usage.html

The copyright of individual parts of the supplement might differ from the article licence.
